# Supplementary material for: Geometries and stabilities of chromium doped nitrogen clusters: mass spectrometry and density functional theory studies
Source: Royal Society of Chemistry journal article supplement (doi:10.1039/d4cp01203h), 2024-01-01
Supplement: d4cp01203h1.pdf [file d4cp01203h1.pdf]

## Supporting Information

# Geometries and Stabilities of Chromium doped Nitrogen Clusters: Mass Spectrometry and Density Functional Theory Studies

Zaifu Jiang,<sup>1‡</sup> Peixin Fu,<sup>1,2‡</sup> Meicheng Chen,<sup>3</sup> Chen Chen,<sup>3</sup> Bole Chen,<sup>4</sup>

Wei Dai,<sup>1</sup> Kewei Ding<sup>5, 6, \*</sup> and Cheng Lu<sup>3, \*</sup>

<sup>1</sup> *School of Mathematics and Physics, Jingchu University of Technology, Hubei 448000, China;*

<sup>2</sup> *Department of Physics and Optoelectronic Engineering, Yangtze University, Jingzhou 434023, China;*

<sup>3</sup> *School of Mathematics and Physics, China University of Geosciences (Wuhan), Wuhan 430074, China;*

<sup>4</sup> *School of Science, Chongqing University of Posts and Telecommunications, Chongqing 400065, China;*

<sup>5</sup> *Xi'an Modern Chemistry Research Institute, Xi'an 710065, China;*

<sup>6</sup> *State Key Laboratory of Fluorine and Nitrogen Chemicals, Xi'an 710065, China.*

\*Corresponding Authors

E-mail: dkw204@163.com (K. W. Ding); E-mail: lucheng@calypso.cn (C. Lu).

‡These authors contributed equally to this work and should be considered as co-first authors.

**Table S1.** The calculated total energies and lowest frequencies of all ground states and metastable isomers of optimized neutral CrN<sub>n</sub> clusters ( $n = 2-11$ ).

| $n$ | Ground state<br>(na)/eV | Frequency<br>(na)/cm <sup>-1</sup> | Isomer<br>(nb) /eV | Frequency<br>(nb)/cm <sup>-1</sup> | Isomer<br>(nc) /eV | Frequency<br>(nc)/cm <sup>-1</sup> |
|-----|-------------------------|------------------------------------|--------------------|------------------------------------|--------------------|------------------------------------|
| 2   | -31398.685              | 64.98                              | -31397.569         | 395.23                             | -31392.378         | 281.16                             |
| 3   | -32886.998              | 105.72                             | -32886.499         | 56.37                              | -32885.993         | 116.62                             |
| 4   | -34378.884              | 52.60                              | -34378.248         | 57.74                              | -34376.223         | 89.34                              |
| 5   | -35867.758              | 40.70                              | -35867.173         | 36.76                              | -35866.713         | 73.04                              |
| 6   | -37359.281              | 22.62                              | -37359.027         | 59.13                              | -37358.945         | 40.56                              |
| 7   | -38847.673              | 27.32                              | -38847.646         | 15.62                              | -38847.605         | 46.75                              |
| 8   | -40339.788              | 17.99                              | -40339.639         | 28.08                              | -40339.513         | 20.59                              |
| 9   | -41828.048              | 10.81                              | -41828.045         | 12.22                              | -41827.961         | 35.28                              |
| 10  | -43320.045              | 10.42                              | -43320.023         | 24.09                              | -43317.161         | 23.54                              |
| 11  | -44809.452              | 25.48                              | -44809.433         | 12.73                              | -44801.661         | 36.98                              |

**Table S2.** The calculated total energies and lowest frequencies of all ground states and metastable isomers of optimized cationic CrN<sub>n</sub><sup>+</sup> clusters ( $n = 2-11$ ).

| $n$ | Ground state<br>(na')/eV | Frequency<br>(na')/cm <sup>-1</sup> | Isomer<br>(nb') /eV | Frequency<br>(nb')/cm <sup>-1</sup> | Isomer<br>(nc') /eV | Frequency<br>(nc')/cm <sup>-1</sup> |
|-----|--------------------------|-------------------------------------|---------------------|-------------------------------------|---------------------|-------------------------------------|
| 2   | -31392.675               | 182.77                              | -31392.246          | 134.80                              | -31385.171          | 192.36                              |
| 3   | -32879.964               | 99.63                               | -32879.149          | 82.29                               | -32875.991          | 426.95                              |
| 4   | -34373.823               | 47.02                               | -34373.346          | 43.04                               | -34372.890          | 39.09                               |
| 5   | -35861.133               | 43.81                               | -35859.853          | 76.77                               | -35856.594          | 206.95                              |
| 6   | -37354.633               | 30.61                               | -37354.303          | 29.60                               | -37347.551          | 39.53                               |
| 7   | -38842.137               | 38.86                               | -38841.714          | 21.78                               | -38838.104          | 5.13                                |
| 8   | -40335.439               | 37.18                               | -40328.400          | 16.93                               | -40328.306          | 37.36                               |
| 9   | -41822.743               | 24.58                               | -41813.638          | 60.54                               | -41809.886          | 29.49                               |
| 10  | -43315.958               | 20.88                               | -43309.193          | 16.72                               | -43309.006          | 47.63                               |
| 11  | -44803.348               | 37.79                               | -44803.333          | 32.52                               | -44803.120          | 29.40                               |

**Table S3.** The HOMO-LUMO gap values (HLGs) (in eV) of open-shell structure of the low-lying  $\text{CrN}_n^{0/+}$  cluster ( $n = 2-11$ ) via the representations of  $\alpha$ - (spin-up) and  $\beta$ -orbital (spin-down).

| $n$ | $\text{CrN}_n$ |      | $\text{CrN}_n^+$ |       |
|-----|----------------|------|------------------|-------|
|     | Alpha          | Beta | Alpha            | Beta  |
| 2   | 5.26           | 3.58 | 7.28             | 12.31 |
| 3   | 5.38           | 2.77 | 8.53             | 8.12  |
| 4   | 5.77           | 2.77 | 7.57             | 10.52 |
| 5   | 5.96           | 4.23 | 8.53             | 8.62  |
| 6   | 5.99           | 2.77 | 7.66             | 11.37 |
| 7   | 4.16           | 6.57 | 9.01             | 9.70  |
| 8   | 6.74           | 3.22 | 8.23             | 13.33 |
| 9   | 4.04           | 6.91 | 8.69             | 9.57  |
| 10  | 6.54           | 1.41 | 7.89             | 12.94 |
| 11  | 5.76           | 5.14 | 9.01             | 9.55  |

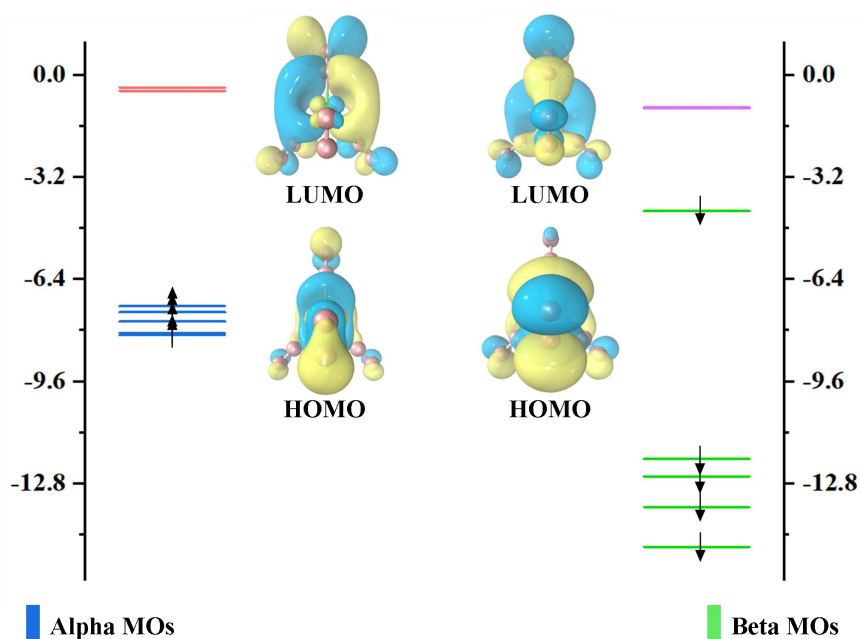

**Figure S4.** The molecular orbitals of the ground state structure of CrN<sub>8</sub> cluster. The blue and green lines indicate positions of the occupied  $\alpha$  and  $\beta$  orbitals, while the red and pink lines indicate the unoccupied  $\alpha$  and  $\beta$  orbitals, respectively.

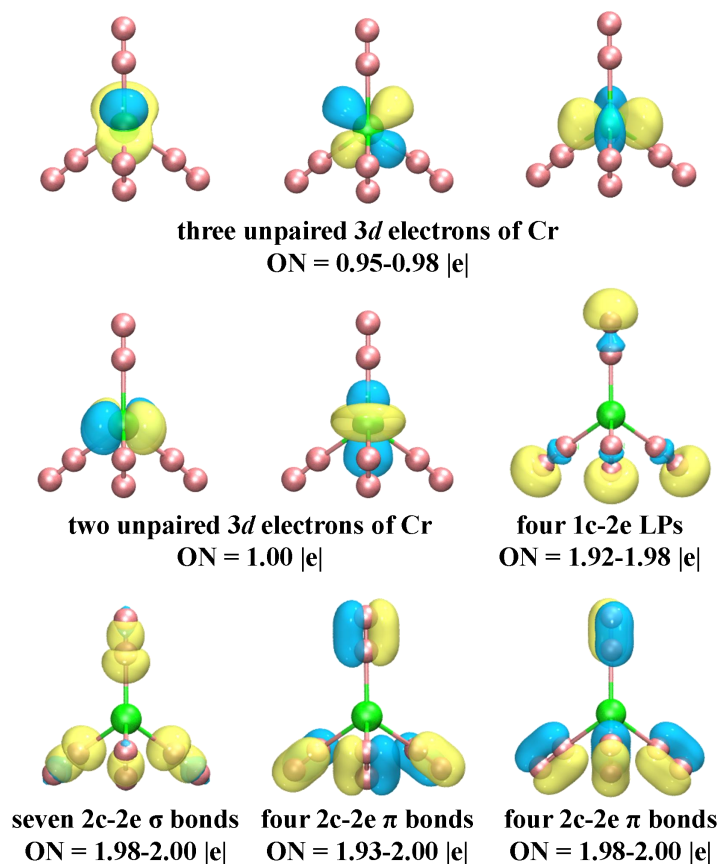

**Figure S5.** AdNDP analysis of the ground state structure of CrN<sub>8</sub> cluster. ON indicates the number of occupied electrons.
